# Supplementary material for: Visualization of choline-based phospholipids at the interface of oil/water emulsions with TEPC-15 antibody. Immunofluorescence applied to colloidal systems
Source: Royal Society of Chemistry journal article supplement (doi:10.1039/c6ra13775j), 2016-01-01
Supplement: c6ra13775j1.pdf [file c6ra13775j1.pdf]

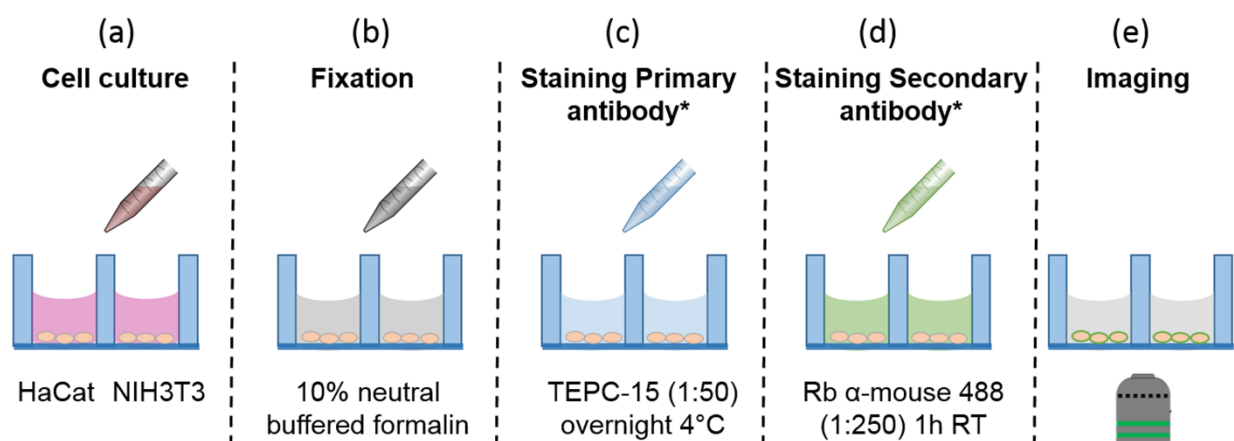

**Figure S1:** Schematization of the cell staining procedure. (a) HaCat and NIH3T3 cells were grown in multiwell  $\mu$ -plate in DMEM medium supplemented with L-glutamine 200 mM, 10% fetal bovine serum and the appropriate amount of penicillin/streptomycin in a humidified atmosphere containing 5% CO<sub>2</sub> in air. (b) Cells were fixed with 10% neutral buffer formalin. (c) Primary anti-PC antibody, TEPC-15, were added at a dilution of 1:50 overnight at 4°C. (d) Secondary antibody, Rb  $\alpha$ -mouse 488, was added at a dilution of 1:250 for 1h at room temperature (RT) in dark. (e) Imaging of the sample with CLSM. \* Washing steps with PBS to remove unbound antibodies.

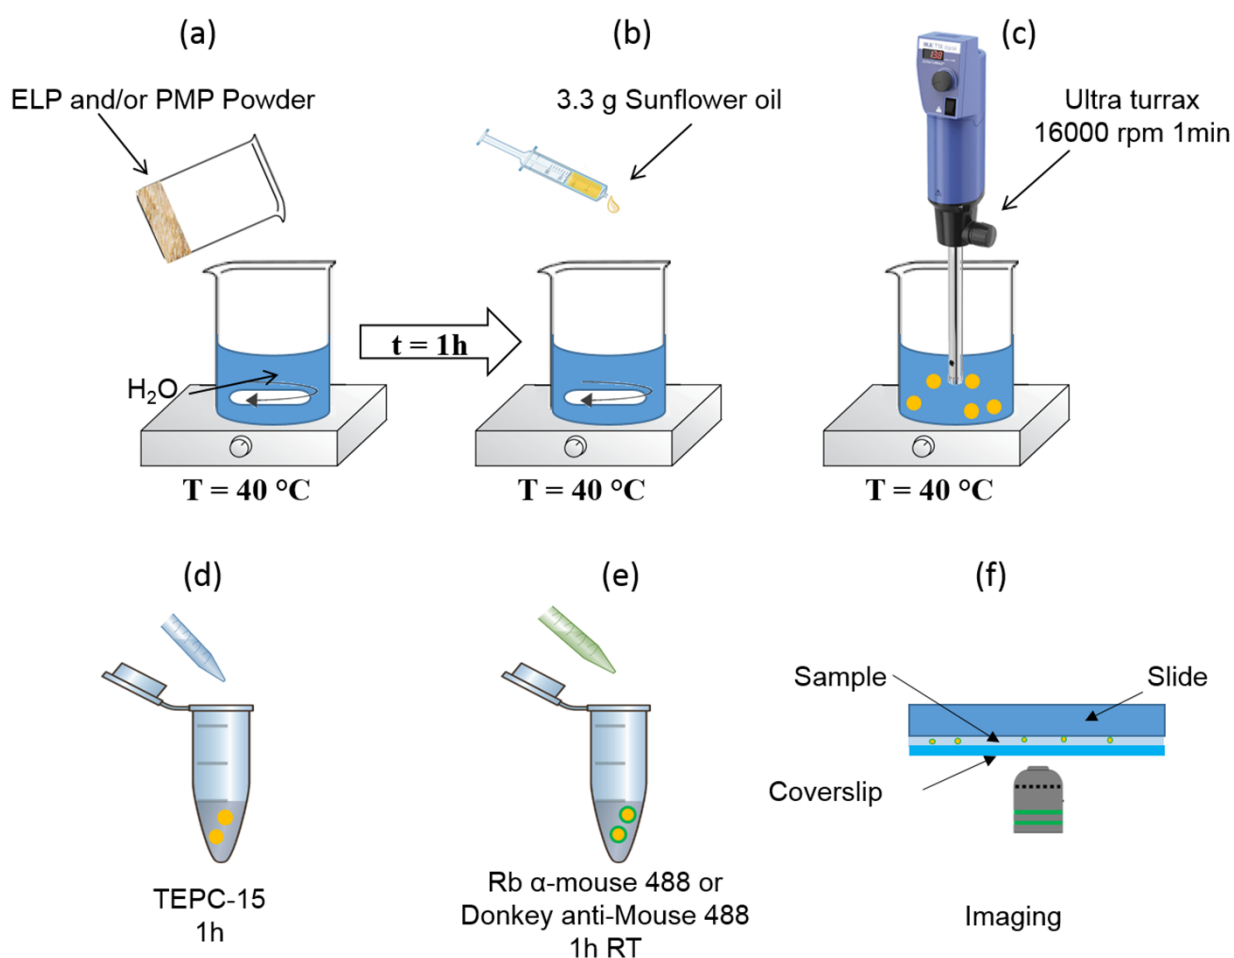

**Figure S2:** Schematization of the emulsion staining procedure. (a) ELP (0.10 g) and/or PMP (5.63 g) powders were added to the water at 40°C for 1h under gentle stirring until complete dissolution of the powder. (b) Addition of 3.3g of sunflower oil to the solution. (c) Emulsification with an Ultra-Turrax T18 digital homogenizer at 16000 rpm for 1 min. (d) TEPC-15 at a dilution ranging from 1:200 to 1:10 was added to 100  $\mu$ L of emulsion and incubated for 1h at RT. (e) Rb  $\alpha$ -mouse 488 or Donkey anti-Mouse 488 was added for 1h at RT in dark. (f) Imaging of the sample. In order to avoid movement of the droplets, the sample was mixed with a drop of agarose solution 0.5%.

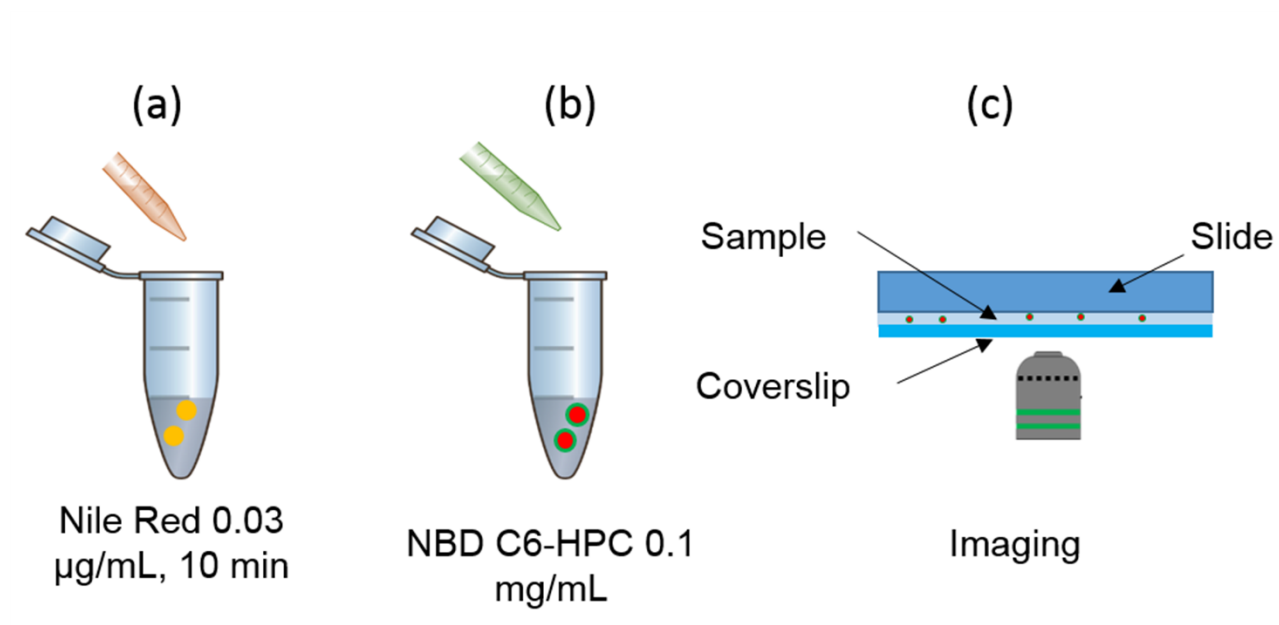

**Figure S3:** Double staining of the emulsion. (a) Nile red was added to the oil phase before emulsification at a concentration of 0.03  $\mu$ g/mL. (b) Addition of NBD C6-HPC at a concentration of 0.1 mg/mL just before imaging. (c) Imaging of the sample.

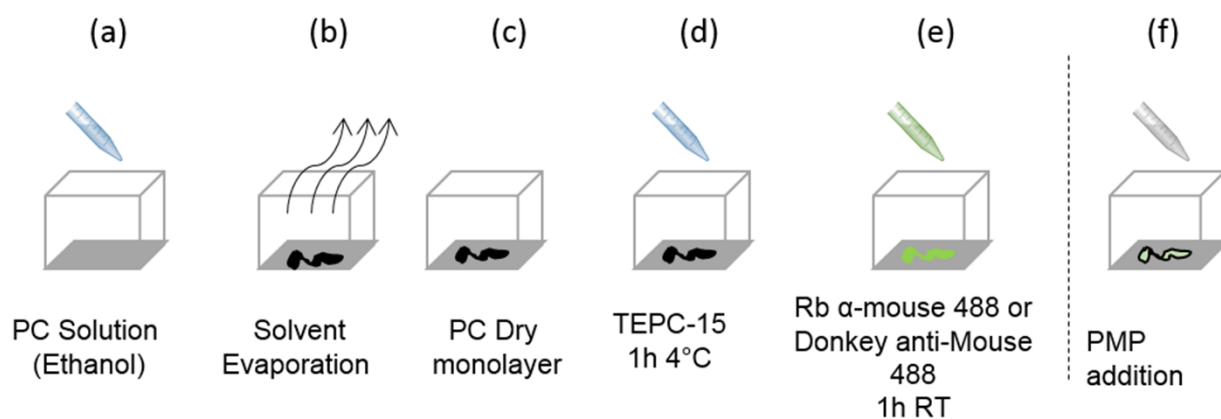

**Figure S4:** Schematization of the PC film staining procedure. (a) 0.4  $\mu$ L of Purified egg L- $\alpha$ -phosphatidylcholine suspended in ethanol was uniformly distributed on the bottom of a  $\mu$ -Slide 8 Well. (b) Ethanol was left to evaporate at RT. (c) A dry monolayer of PC was obtained. (d) TEPC-15 was added at a dilution of 1:10 for 1h at RT. (e) Rb  $\alpha$ -mouse 488 at a dilution of 1:250 was added for 1h at RT in dark. Washing steps were omitted to avoid loss of materials. (f) In order to study the effect of proteins, 150  $\mu$ L of PMP solution were added and images of the sample were recorded at different times.

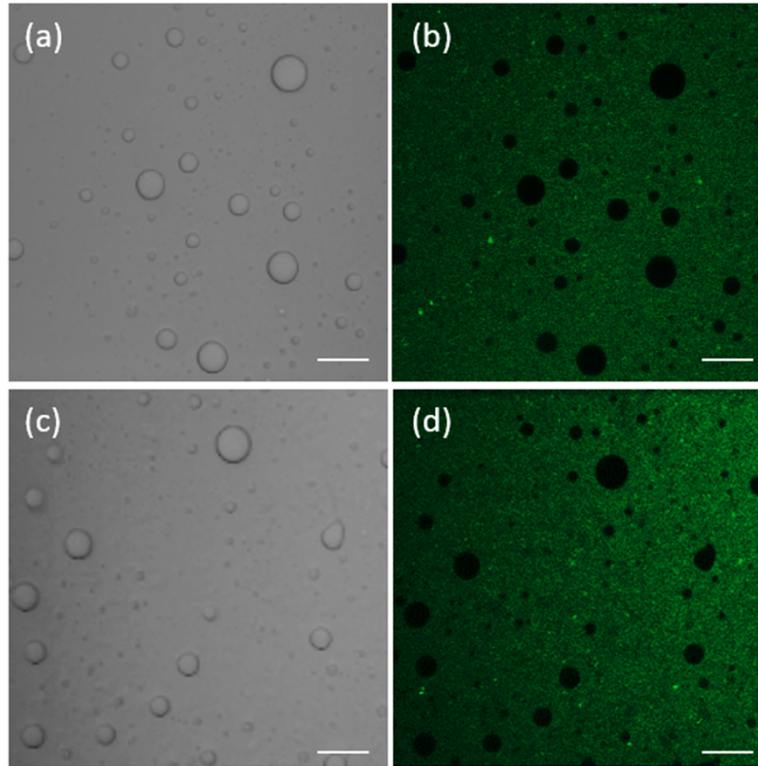

**Figure S5:** Negative control experiment. The emulsion was stabilized with proteins only (no phospholipids added). 100  $\mu\text{L}$  of emulsion was incubated with TEPC-15 at a dilution of 1:10 for 1h. Then, Rb  $\alpha$ -mouse 488 was added at a dilution of 1:100 and incubated for 1h in the dark. Images were acquired in the brightfield mode (a-c) or confocal mode (b-d), where it is noticeable that antibodies are in the bulk and not at the droplet interface. White bars are 10  $\mu\text{m}$ .
